# Supplementary material
Source: publisher figshare collection journal article supplement (https://acs.figshare.com/ndownloader/files/4621267)
Supplement: Supplementary file 1 [file 4621267]

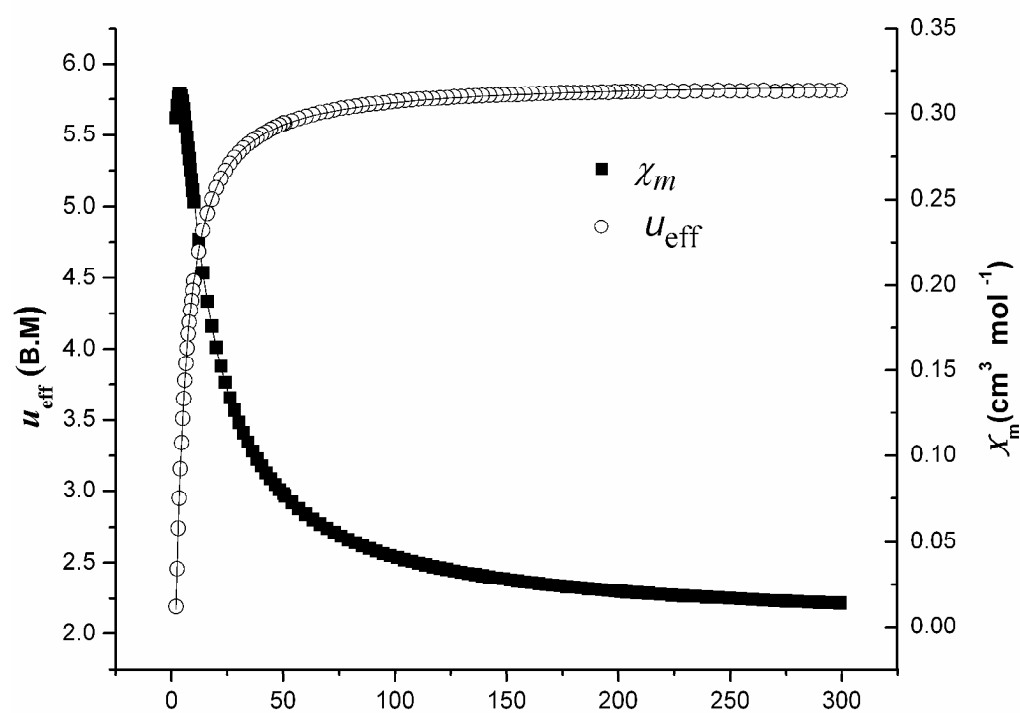

**Figure S1.** Plots of  $\mu_{\text{eff}}$  (○) and  $\chi_m$  (■) vs. temperature for **2**; the solid line represents the best fit.

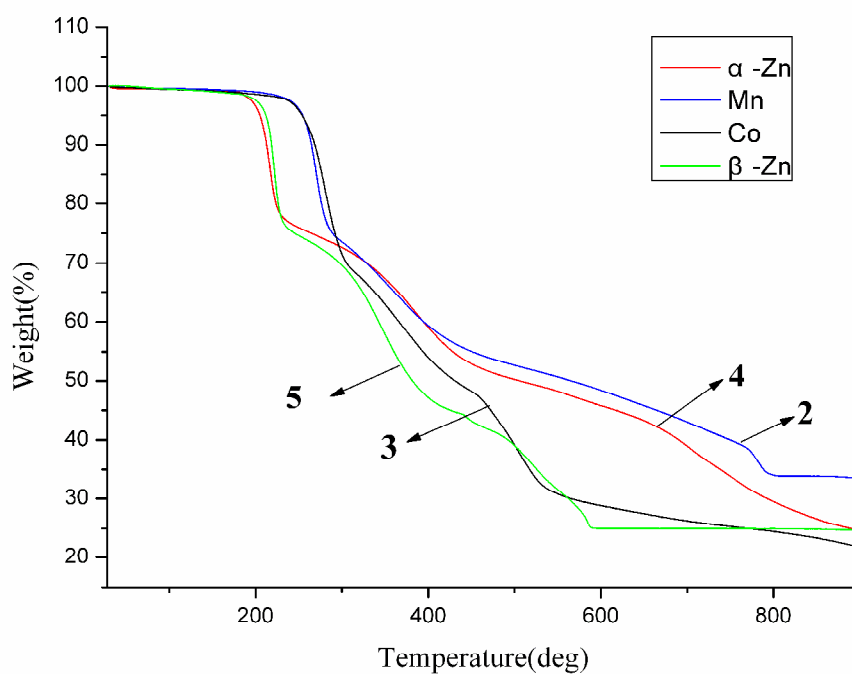

**Figure S2** TGA showing the weight loss of compounds **2**(blue), **3**(black), **4**(red), **5**(green).
